# Supplementary material for: Zinc oxide nanoparticles induce oxidative stress, genotoxicity, and apoptosis in the hemocytes of Bombyx mori larvae
Source: PubMed Central journal article supplement (PMC9981692; doi:10.1038/s41598-023-30444-y), 2023-03-02
Supplement: 41598_2023_30444_MOESM1_ESM.pdf [file 41598_2023_30444_MOESM1_ESM.pdf]

## **Zinc oxide nanoparticles induce oxidative stress, genotoxicity and apoptosis in the hemocytes of *Bombyx mori* larvae**

Rania Belal<sup>1</sup> and Abir Gad<sup>2\*</sup>

<sup>1</sup> Department of Genetics, Faculty of Agriculture, University of Alexandria, Alexandria 21545, Egypt. E-mail: rania.belal@alexu.edu.eg

<sup>2</sup>Department of Applied Entomology and Zoology, Faculty of Agriculture, University of Alexandria, Alexandria 21545, E-mail: abeer.gad@alexu.edu.eg

\*Corresponding author: Abir Gad. Department of Applied Entomology and Zoology, Faculty of Agriculture, University of Alexandria, Alexandria 21545, E-mail: abeer.gad@alexu.edu.eg

S1: <https://doi.org/10.1111/phen.12333>

Toxicity effect of Silver Nanoparticles to the Haemocytes and Antioxidant activity of Silkworm *Bombyx mori*. *Physiol Entomol* (2020) 45:154–160.

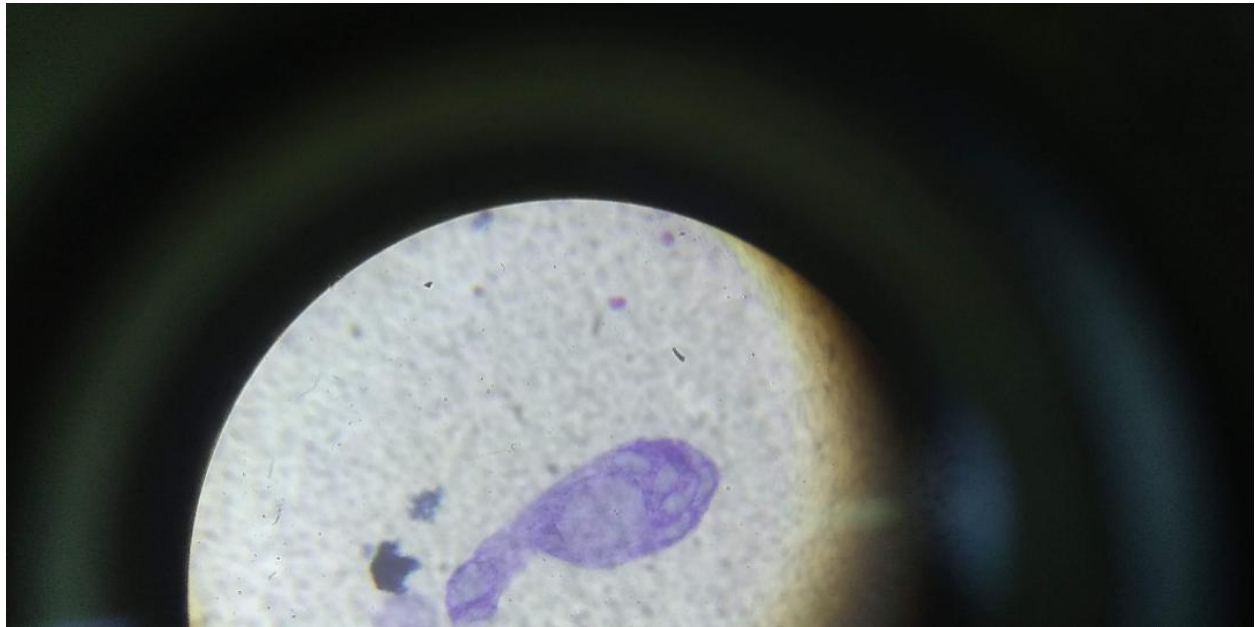

S2: Effect of ZNO- NPS at concentration 100 µg/ml on Oenocyte, the treatment caused cytoplasm lysis

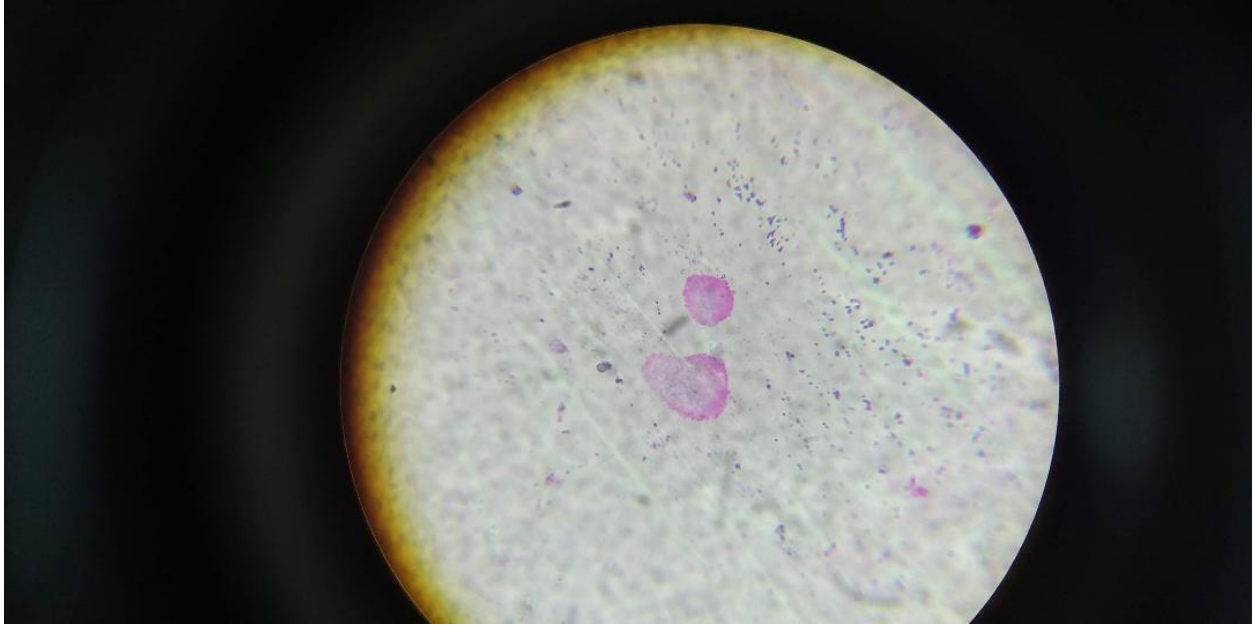

S3: Effect of ZNO- NPS at concentration 50 and 100  $\mu\text{g/ml}$  on granulocyte, the treatment caused apoptotic cells

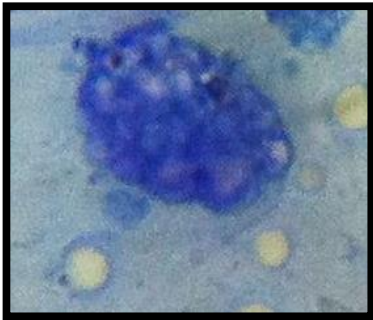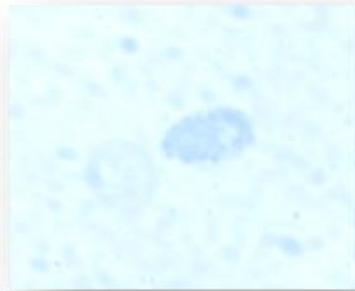

S4: Effect of ZNO- NPS at concentration 50 and 100  $\mu\text{g/ml}$  on Oenocyte, the treatment caused numerous vacuoles covering the cytoplasm.

| Gene Name <sup>a</sup>                               | Fold change <sup>b</sup> | Expression <sup>c</sup> | Student-test <i>P</i> value <sup>d</sup> |
|------------------------------------------------------|--------------------------|-------------------------|------------------------------------------|
| Arginine Kinase ( <i>AK</i> )                        | 0.735433                 | ↓                       | 0.6083                                   |
| Glutathion S- transferase ( <i>GST</i> )             | 2.049114                 | ↑                       | 0.008556                                 |
| Cytosolic non-specific dipeptidase 2( <i>CNDP2</i> ) | 3.63                     | ↑                       | 0.005099                                 |
| Calexcitine- 2 like genes ( <i>CE</i> )              | 2.375                    | ↑                       | 0.004792                                 |

S5: Statistical analysis of real-time expression of studied genes.

<sup>a</sup> Gene name . <sup>b</sup> Fold change control/ treatment . <sup>c</sup> Gene expression : describes the down regulation while ↑ describes the up regulation. <sup>d</sup> differences between means were tested for significance at 0.05 using T-test.
